# Supplementary material
Source: PubMed Central journal article supplement (PMC6498021)
Supplement: JCM.01664-18-s0001.pdf [file JCM.01664-18-s0001.pdf]

## SUPPLEMENTAL MATERIAL

### Johnson J.R. et al. Rapid emergence, subsidence, and molecular detection of *Escherichia coli* sequence type 1193-*fimH64* (ST1193-*H64*), a new disseminated multidrug-resistant commensal and extraintestinal pathogen.

**Table S1. Virulence genes of *Escherichia coli* isolates from sequence type ST1193-*H64* or other ST14 complex (STc14) STs.**

| Virulence gene      |                                    |                                | Prevalence of virulence gene <sup>a</sup><br>(column %) |                                       | P value |
|---------------------|------------------------------------|--------------------------------|---------------------------------------------------------|---------------------------------------|---------|
| Functional category | Specific gene <sup>a,b,c,d,e</sup> | Definition                     | Other STc14 isolates<br>(n = 37)                        | ST1193- <i>H64</i><br>(n = 83 or 117) |         |
| Adhesin             | F10 <i>papA</i> allele             | Antigenic variant, P fimbriae  | 31 (85)                                                 | 87 (100)                              | 0.006   |
|                     | <i>papA/C/EF/G</i> II              | <i>pap</i> operon (P fimbriae) | 6 (16)                                                  | 0 (0)                                 | 0.001   |
|                     | <i>sfa/focDE</i>                   | S and F1C fimbriae             | 4 (11)                                                  | 0 (0)                                 | 0.008   |
|                     | <i>focG</i>                        | F1C adhesin                    | 3 (8)                                                   | 0 (0)                                 | 0.03    |
|                     | <i>afa/draBC</i>                   | Dr-binding adhesin             | 16 (43)                                                 | 0 (0)                                 | < 0.001 |
| Toxin               | <i>hlyD</i>                        | alpha hemolysin                | 4 (11)                                                  | 1 (1)                                 | 0.03    |
|                     | <i>sat</i>                         | secreted autotransporter toxin | 30 (81)                                                 | 80 (96)                               | 0.009   |
| Siderophore         | <i>iroN</i>                        | salmochelins receptor          | 5 (14)                                                  | 0 (0)                                 | 0.002   |
|                     | <i>ireA</i>                        | siderophore receptor           | 5 (14)                                                  | 1 (1)                                 | 0.01    |
| Protectin           | K1 ( <i>kpsM</i> allele)           | group 2 capsule variant        | 0 (0)                                                   | 62 (75)                               | < 0.001 |
|                     | K5 ( <i>kfiC</i> )                 | group 2 capsule variant        | 34 (92)                                                 | 20 (24)                               | < 0.001 |
|                     | <i>traT</i>                        | serum-resistance associated    | 24 (65)                                                 | 2 (2)                                 | < 0.001 |
|                     | O75 <i>rfb</i>                     | O75 antigen                    | 35 (95)                                                 | 127 (100)                             | .0498   |
|                     | O18 <i>rfb</i>                     | O18 antigen                    | 2 (5)                                                   | 0 (0)                                 | .0498   |
| Miscellaneous       | <i>ibeA</i>                        | invasion of brain endothelium  | 7 (19)                                                  | 0 (0)                                 | < 0.001 |
|                     | <i>clbB/N</i>                      | colibactin synthesis           | 31 (84)                                                 | 0 (0)                                 | < 0.001 |

<sup>a</sup>Genes shown are those that differed significantly in prevalence between ST1193 vs. other STc14 STs.

<sup>b</sup>Genes detected in all isolates (prevalence, 100%): *fimH*, *yfcV*, *fyuA*, *usp*, *ompT*, and *malX*.

<sup>c</sup>Other genes detected in ≥ 1 isolate but without a significant prevalence difference between ST1193 vs. other STc14 STs (respective prevalence): *afaE8* (3% vs. 0%), *iha* (87% vs. 93%), *hra* (3% vs. 0%), *cnf1* (3% vs. 0%), *cdtB* (3% vs. 0%), *pic* (3% vs. 0%), *vat* (0% vs. 99%), *iutA* (87% vs. 93%), *chuA* (100% vs. 89%), and *kpsM* II (95% vs. 99%).

<sup>d</sup>Genes sought but not detected: *sfaS*, *bmaE*, *clpG*, *gafD*, *hlyF*, *tsh*, *astA*, *kpsM* III, K15, *rfc*, *cvaC*, *iss*, and H7 *fliC*.

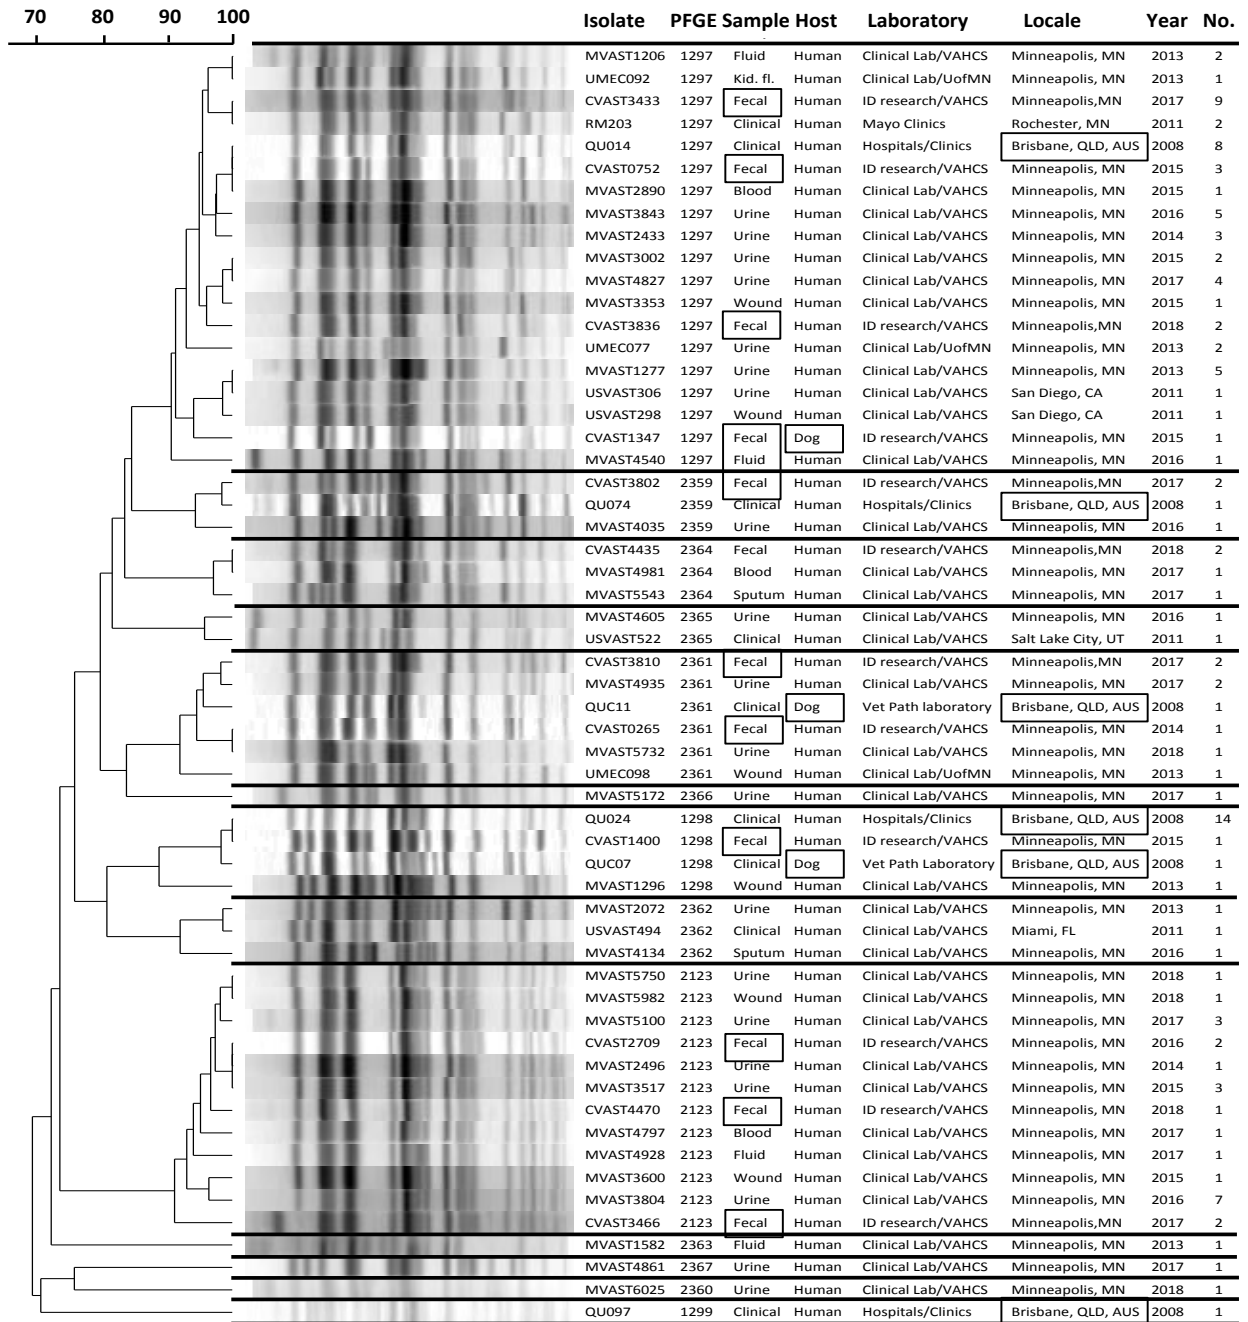

**Fig. S1. Pulsed-field gel electrophoresis profiles of *Escherichia coli* ST1193-H64 isolates.** Scale is percent profile similarity according to Dice coefficients. Dendrogram is based on one arbitrarily selected representative for each unique combination of pulsotype, specimen type (Sample), host, laboratory, locale, and year. Horizontal lines separate different pulsotypes (defined at the 94% profile similarity level in comparison with the index profile for a given pulsotype). Boxes indicate: in the Sample column, fecal isolates (others are clinical isolates); in the Host column, dog isolates (others are from humans); and in the locale column, Australian isolates (others are from the USA). **Definitions:** AUS, Australia; ID, Infectious Diseases; Kid., kidney; fl., fluid; Lab, laboratory; No, total number of isolates with the particular combination of characteristics; PFGE, pulsotype; QLD, Queensland; VAHCS, Veterans Affairs Health Care System; Vet Path, veterinary pathology.

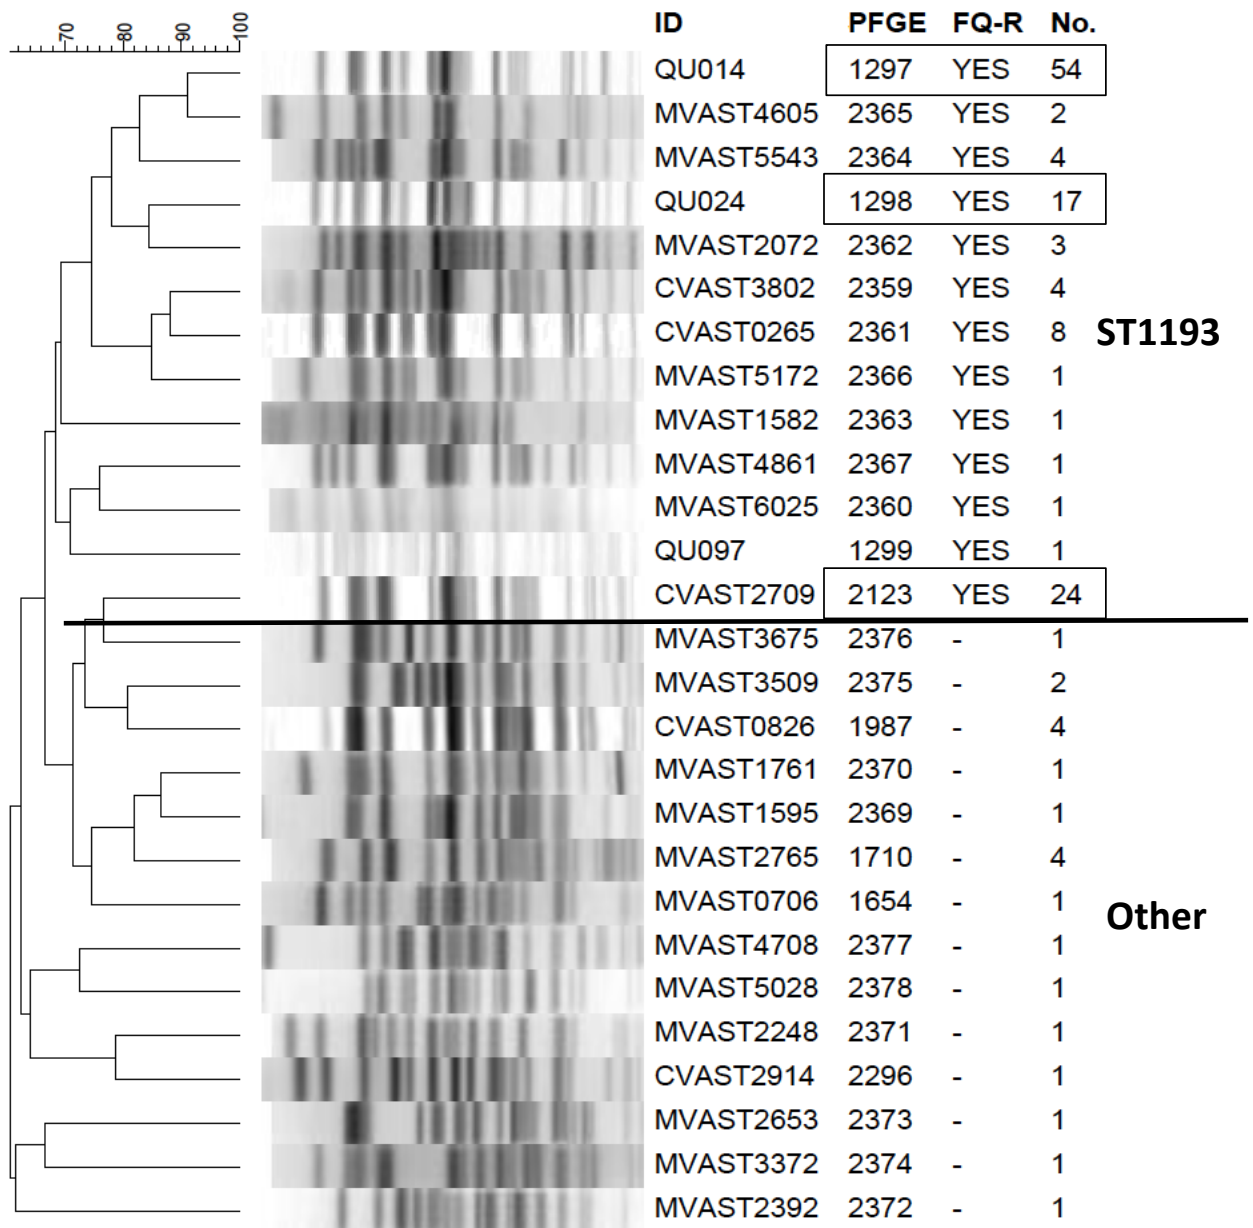

**Fig. S2. Pulsed-field gel electrophoresis profiles of index *Escherichia coli* isolates from ST1193-H64 vs. other STs from the ST14 complex.** Scale is percent profile similarity according to Dice coefficients. Dendrogram is based on the index profile for each pulsotype. Horizontal line separates ST1193-H64 isolates from other ST14 complex isolates. Boxes: three most prevalent pulsotypes (1297, 1298, 2123). **Definitions:** ID, identifier; PFGE, pulsotype; FQ-R, fluoroquinolone-resistant; No., total number of study isolates represented by the particular pulsotype; -, not FQ-R; Other, non-ST1193-H64.
